# Supplementary material
Source: publisher figshare collection journal article supplement (https://acs.figshare.com/ndownloader/files/4272956)
Supplement: Supplementary file 1 [file 4272956]

 
data_shelxs 
 
_audit_creation_method            SHELXL-97 
_chemical_name_systematic 
; 
 ? 
; 
_chemical_name_common             ? 
_chemical_melting_point           ? 
_chemical_formula_moiety          ? 
_chemical_formula_sum 
 'C14 H14 O3' 
_chemical_formula_weight          230.25 
 
loop_ 
 _atom_type_symbol 
 _atom_type_description 
 _atom_type_scat_dispersion_real 
 _atom_type_scat_dispersion_imag 
 _atom_type_scat_source 
 'C'  'C'   0.0033   0.0016 
 'International Tables Vol C Tables 4.2.6.8 and 6.1.1.4' 
 'H'  'H'   0.0000   0.0000 
 'International Tables Vol C Tables 4.2.6.8 and 6.1.1.4' 
 'O'  'O'   0.0106   0.0060 
 'International Tables Vol C Tables 4.2.6.8 and 6.1.1.4' 
 
_symmetry_cell_setting            'monoclinic'
_symmetry_space_group_name_H-M    'P 21/c'
_symmetry_space_group_name_Hall   '-P 2ybc' 
 
loop_ 
 _symmetry_equiv_pos_as_xyz 
 'x, y, z' 
 '-x, y+1/2, -z+1/2' 
 '-x, -y, -z' 
 'x, -y-1/2, z-1/2' 
 
_cell_length_a                    10.891(2) 
_cell_length_b                    6.4637(13) 
_cell_length_c                    16.503(3) 
_cell_angle_alpha                 90.00 
_cell_angle_beta                  101.84(3) 
_cell_angle_gamma                 90.00 
_cell_volume                      1137.1(4) 
_cell_formula_units_Z             4 
_cell_measurement_temperature     110(2) 
_cell_measurement_reflns_used     2945
_cell_measurement_theta_min       2.0619
_cell_measurement_theta_max       31.0052 
 
_exptl_crystal_description        ? 
_exptl_crystal_colour             ? 
_exptl_crystal_size_max           0.22 
_exptl_crystal_size_mid           0.22 
_exptl_crystal_size_min           0.09 
_exptl_crystal_density_meas       ? 
_exptl_crystal_density_diffrn     1.345 
_exptl_crystal_density_method     'not measured' 
_exptl_crystal_F_000              488 
_exptl_absorpt_coefficient_mu     0.094 
_exptl_absorpt_correction_type    'multi-scan' 
_exptl_absorpt_correction_T_min   0.9796 
_exptl_absorpt_correction_T_max   0.9918 
_exptl_absorpt_process_details    'R. H. Blessing, Acta Cryst. 1995 A51, 33-38'
 
_exptl_special_details 
; 
 ? 
; 
 
_diffrn_ambient_temperature       110(2) 
_diffrn_radiation_wavelength      0.71073 
_diffrn_radiation_type            MoK\a 
_diffrn_radiation_source          'fine-focus sealed tube' 
_diffrn_radiation_monochromator   graphite 
_diffrn_measurement_device_type  'CCD area deterctor'
_diffrn_measurement_method       '\w scans' 
_diffrn_detector_area_resol_mean  ? 
_diffrn_standards_number          ? 
_diffrn_standards_interval_count  ? 
_diffrn_standards_interval_time   ? 
_diffrn_standards_decay_%         ? 
_diffrn_reflns_number             9050 
_diffrn_reflns_av_R_equivalents   0.0355 
_diffrn_reflns_av_sigmaI/netI     0.0369 
_diffrn_reflns_limit_h_min        -14 
_diffrn_reflns_limit_h_max        14 
_diffrn_reflns_limit_k_min        -8 
_diffrn_reflns_limit_k_max        7 
_diffrn_reflns_limit_l_min        -19 
_diffrn_reflns_limit_l_max        22 
_diffrn_reflns_theta_min          1.91 
_diffrn_reflns_theta_max          28.28 
_reflns_number_total              2813 
_reflns_number_gt                 2422 
_reflns_threshold_expression      >2sigma(I) 
 
_computing_data_collection        'CrystalClear (Rigaku Inc., 2007)'
_computing_cell_refinement        'CrystalClear (Rigaku Inc., 2007)'
_computing_data_reduction         'CrystalClear (Rigaku Inc., 2007)'
_computing_structure_solution     'SHELXS-97 (Sheldrick, 1990)' 
_computing_structure_refinement   'SHELXL-97 (Sheldrick, 1997)' 
_computing_molecular_graphics     ? 
_computing_publication_material   ? 
 
_refine_special_details 
; 
 Refinement of F^2^ against ALL reflections.  The weighted R-factor wR and 
 goodness of fit S are based on F^2^, conventional R-factors R are based 
 on F, with F set to zero for negative F^2^. The threshold expression of 
 F^2^ > 2sigma(F^2^) is used only for calculating R-factors(gt) etc. and is 
 not relevant to the choice of reflections for refinement.  R-factors based 
 on F^2^ are statistically about twice as large as those based on F, and R- 
 factors based on ALL data will be even larger. 
; 
 
_refine_ls_structure_factor_coef  Fsqd  
_refine_ls_matrix_type            full 
_refine_ls_weighting_scheme       calc  
_refine_ls_weighting_details 
 'calc w=1/[\s^2^(Fo^2^)+(0.0518P)^2^+0.6548P] where P=(Fo^2^+2Fc^2^)/3' 
_atom_sites_solution_primary      direct 
_atom_sites_solution_secondary    difmap 
_atom_sites_solution_hydrogens    geom 
_refine_ls_hydrogen_treatment     constr 
_refine_ls_extinction_method      none 
_refine_ls_extinction_coef        ? 
_refine_ls_number_reflns          2813 
_refine_ls_number_parameters      155 
_refine_ls_number_restraints      0 
_refine_ls_R_factor_all           0.0828 
_refine_ls_R_factor_gt            0.0711 
_refine_ls_wR_factor_ref          0.1561 
_refine_ls_wR_factor_gt           0.1479 
_refine_ls_goodness_of_fit_ref    1.147 
_refine_ls_restrained_S_all       1.147 
_refine_ls_shift/su_max           0.005 
_refine_ls_shift/su_mean          0.001 
 
loop_ 
 _atom_site_label 
 _atom_site_type_symbol 
 _atom_site_fract_x 
 _atom_site_fract_y 
 _atom_site_fract_z 
 _atom_site_U_iso_or_equiv 
 _atom_site_adp_type 
 _atom_site_occupancy 
 _atom_site_symmetry_multiplicity 
 _atom_site_calc_flag 
 _atom_site_refinement_flags 
 _atom_site_disorder_assembly 
 _atom_site_disorder_group 
O3 O 0.79886(15) 1.1105(2) 0.58731(9) 0.0392(4) Uani 1 1 d . . . 
O2 O 0.89518(15) 0.8062(3) 0.58410(10) 0.0429(4) Uani 1 1 d . . . 
O1 O 0.49624(14) 1.0661(3) 0.63440(11) 0.0486(5) Uani 1 1 d . . . 
C1 C 0.83905(17) 0.9262(3) 0.61876(12) 0.0297(4) Uani 1 1 d . . . 
C2 C 0.81147(17) 0.8970(3) 0.70372(12) 0.0276(4) Uani 1 1 d . . . 
C3 C 0.6572(2) 0.9648(3) 0.80002(13) 0.0364(5) Uani 1 1 d . . . 
H3A H 0.5771 0.9142 0.8122 0.044 Uiso 1 1 calc R . . 
H3B H 0.6606 1.1173 0.8055 0.044 Uiso 1 1 calc R . . 
C4 C 0.67267(17) 0.8970(3) 0.71479(13) 0.0294(4) Uani 1 1 d . . . 
C5 C 0.7774(2) 0.6478(3) 0.81635(13) 0.0346(5) Uani 1 1 d . . . 
H5A H 0.8615 0.5849 0.8338 0.042 Uiso 1 1 calc R . . 
H5B H 0.7137 0.5523 0.8303 0.042 Uiso 1 1 calc R . . 
C6 C 0.74971(17) 0.6980(3) 0.72468(13) 0.0293(4) Uani 1 1 d . . . 
C7 C 0.7713(2) 0.8614(3) 0.85745(13) 0.0370(5) Uani 1 1 d . . . 
H7 H 0.7616 0.8513 0.9163 0.044 Uiso 1 1 calc R . . 
C8 C 0.90328(18) 0.9991(3) 0.77065(13) 0.0334(5) Uani 1 1 d . . . 
H8 H 0.9726 1.0741 0.7589 0.040 Uiso 1 1 calc R . . 
C9 C 0.71848(19) 0.5279(3) 0.66146(14) 0.0359(5) Uani 1 1 d . . . 
H9A H 0.7973 0.4739 0.6485 0.043 Uiso 1 1 calc R . . 
H9B H 0.6776 0.4132 0.6856 0.043 Uiso 1 1 calc R . . 
C10 C 0.57395(19) 0.9255(3) 0.64001(14) 0.0367(5) Uani 1 1 d . . . 
C11 C 0.6335(2) 0.5971(4) 0.58242(15) 0.0402(5) Uani 1 1 d . . . 
H11 H 0.6244 0.5073 0.5360 0.048 Uiso 1 1 calc R . . 
C12 C 0.8851(2) 0.9820(4) 0.84782(14) 0.0378(5) Uani 1 1 d . . . 
H12 H 0.9405 1.0423 0.8937 0.045 Uiso 1 1 calc R . . 
C13 C 0.56989(19) 0.7751(4) 0.57244(15) 0.0407(5) Uani 1 1 d . . . 
H13 H 0.5199 0.8060 0.5196 0.049 Uiso 1 1 calc R . . 
C14 C 0.8282(3) 1.1606(4) 0.50795(15) 0.0553(7) Uani 1 1 d . . . 
H14A H 0.9185 1.1433 0.5110 0.083 Uiso 1 1 calc R . . 
H14B H 0.8044 1.3043 0.4937 0.083 Uiso 1 1 calc R . . 
H14C H 0.7817 1.0681 0.4654 0.083 Uiso 1 1 calc R . . 
 
loop_ 
 _atom_site_aniso_label 
 _atom_site_aniso_U_11 
 _atom_site_aniso_U_22 
 _atom_site_aniso_U_33 
 _atom_site_aniso_U_23 
 _atom_site_aniso_U_13 
 _atom_site_aniso_U_12 
O3 0.0590(9) 0.0300(8) 0.0352(8) 0.0030(6) 0.0248(7) 0.0082(7) 
O2 0.0506(9) 0.0426(9) 0.0417(9) 0.0024(7) 0.0242(7) 0.0163(7) 
O1 0.0396(8) 0.0457(10) 0.0615(11) -0.0017(8) 0.0131(8) 0.0157(7) 
C1 0.0295(9) 0.0295(10) 0.0314(10) -0.0024(8) 0.0092(8) 0.0013(8) 
C2 0.0285(9) 0.0266(10) 0.0305(10) -0.0015(8) 0.0124(7) -0.0021(7) 
C3 0.0414(11) 0.0311(11) 0.0432(12) -0.0046(9) 0.0239(9) -0.0028(9) 
C4 0.0295(9) 0.0237(10) 0.0378(11) -0.0020(8) 0.0137(8) -0.0006(7) 
C5 0.0372(10) 0.0328(11) 0.0371(11) 0.0012(9) 0.0154(9) -0.0045(8) 
C6 0.0280(9) 0.0242(10) 0.0374(11) -0.0017(8) 0.0105(8) -0.0012(7) 
C7 0.0456(11) 0.0380(12) 0.0314(10) -0.0032(9) 0.0172(9) -0.0057(9) 
C8 0.0321(9) 0.0341(11) 0.0362(11) -0.0047(9) 0.0121(8) -0.0078(8) 
C9 0.0360(10) 0.0285(11) 0.0430(12) -0.0046(9) 0.0074(9) 0.0007(8) 
C10 0.0308(9) 0.0333(11) 0.0480(13) -0.0010(10) 0.0132(9) 0.0006(8) 
C11 0.0383(11) 0.0361(12) 0.0439(13) -0.0117(10) 0.0030(9) -0.0036(9) 
C12 0.0433(11) 0.0376(12) 0.0338(11) -0.0054(9) 0.0107(9) -0.0080(9) 
C13 0.0334(10) 0.0387(13) 0.0457(13) -0.0064(10) -0.0016(9) 0.0016(9) 
C14 0.0871(19) 0.0495(15) 0.0383(13) 0.0126(11) 0.0340(13) 0.0193(14) 
 
_geom_special_details 
; 
 All esds (except the esd in the dihedral angle between two l.s. planes) 
 are estimated using the full covariance matrix.  The cell esds are taken 
 into account individually in the estimation of esds in distances, angles 
 and torsion angles; correlations between esds in cell parameters are only 
 used when they are defined by crystal symmetry.  An approximate (isotropic) 
 treatment of cell esds is used for estimating esds involving l.s. planes. 
; 
 
loop_ 
 _geom_bond_atom_site_label_1 
 _geom_bond_atom_site_label_2 
 _geom_bond_distance 
 _geom_bond_site_symmetry_2 
 _geom_bond_publ_flag 
O3 C1 1.337(2) . ? 
O3 C14 1.447(3) . ? 
O2 C1 1.202(2) . ? 
O1 C10 1.232(3) . ? 
C1 C2 1.505(3) . ? 
C2 C8 1.484(3) . ? 
C2 C6 1.524(3) . ? 
C2 C4 1.560(2) . ? 
C3 C4 1.515(3) . ? 
C3 C7 1.551(3) . ? 
C3 H3A 0.9900 . ? 
C3 H3B 0.9900 . ? 
C4 C10 1.472(3) . ? 
C4 C6 1.527(3) . ? 
C5 C6 1.516(3) . ? 
C5 C7 1.545(3) . ? 
C5 H5A 0.9900 . ? 
C5 H5B 0.9900 . ? 
C6 C9 1.506(3) . ? 
C7 C12 1.500(3) . ? 
C7 H7 1.0000 . ? 
C8 C12 1.333(3) . ? 
C8 H8 0.9500 . ? 
C9 C11 1.504(3) . ? 
C9 H9A 0.9900 . ? 
C9 H9B 0.9900 . ? 
C10 C13 1.473(3) . ? 
C11 C13 1.336(3) . ? 
C11 H11 0.9500 . ? 
C12 H12 0.9500 . ? 
C13 H13 0.9500 . ? 
C14 H14A 0.9800 . ? 
C14 H14B 0.9800 . ? 
C14 H14C 0.9800 . ? 
 
loop_ 
 _geom_angle_atom_site_label_1 
 _geom_angle_atom_site_label_2 
 _geom_angle_atom_site_label_3 
 _geom_angle 
 _geom_angle_site_symmetry_1 
 _geom_angle_site_symmetry_3 
 _geom_angle_publ_flag 
C1 O3 C14 115.81(17) . . ? 
O2 C1 O3 123.23(19) . . ? 
O2 C1 C2 125.48(19) . . ? 
O3 C1 C2 111.20(16) . . ? 
C8 C2 C1 113.87(16) . . ? 
C8 C2 C6 117.91(17) . . ? 
C1 C2 C6 119.95(17) . . ? 
C8 C2 C4 115.71(16) . . ? 
C1 C2 C4 119.52(17) . . ? 
C6 C2 C4 59.34(12) . . ? 
C4 C3 C7 102.41(16) . . ? 
C4 C3 H3A 111.3 . . ? 
C7 C3 H3A 111.3 . . ? 
C4 C3 H3B 111.3 . . ? 
C7 C3 H3B 111.3 . . ? 
H3A C3 H3B 109.2 . . ? 
C10 C4 C3 122.74(17) . . ? 
C10 C4 C6 119.05(17) . . ? 
C3 C4 C6 107.92(17) . . ? 
C10 C4 C2 117.42(17) . . ? 
C3 C4 C2 113.83(17) . . ? 
C6 C4 C2 59.16(12) . . ? 
C6 C5 C7 103.27(17) . . ? 
C6 C5 H5A 111.1 . . ? 
C7 C5 H5A 111.1 . . ? 
C6 C5 H5B 111.1 . . ? 
C7 C5 H5B 111.1 . . ? 
H5A C5 H5B 109.1 . . ? 
C9 C6 C5 120.39(17) . . ? 
C9 C6 C2 120.43(17) . . ? 
C5 C6 C2 113.61(16) . . ? 
C9 C6 C4 120.02(17) . . ? 
C5 C6 C4 106.21(16) . . ? 
C2 C6 C4 61.50(12) . . ? 
C12 C7 C5 107.89(17) . . ? 
C12 C7 C3 106.68(18) . . ? 
C5 C7 C3 102.57(18) . . ? 
C12 C7 H7 113.0 . . ? 
C5 C7 H7 113.0 . . ? 
C3 C7 H7 113.0 . . ? 
C12 C8 C2 117.67(18) . . ? 
C12 C8 H8 121.2 . . ? 
C2 C8 H8 121.2 . . ? 
C11 C9 C6 113.27(18) . . ? 
C11 C9 H9A 108.9 . . ? 
C6 C9 H9A 108.9 . . ? 
C11 C9 H9B 108.9 . . ? 
C6 C9 H9B 108.9 . . ? 
H9A C9 H9B 107.7 . . ? 
O1 C10 C4 121.8(2) . . ? 
O1 C10 C13 121.1(2) . . ? 
C4 C10 C13 117.10(18) . . ? 
C13 C11 C9 125.1(2) . . ? 
C13 C11 H11 117.5 . . ? 
C9 C11 H11 117.5 . . ? 
C8 C12 C7 115.6(2) . . ? 
C8 C12 H12 122.2 . . ? 
C7 C12 H12 122.2 . . ? 
C11 C13 C10 122.7(2) . . ? 
C11 C13 H13 118.6 . . ? 
C10 C13 H13 118.6 . . ? 
O3 C14 H14A 109.5 . . ? 
O3 C14 H14B 109.5 . . ? 
H14A C14 H14B 109.5 . . ? 
O3 C14 H14C 109.5 . . ? 
H14A C14 H14C 109.5 . . ? 
H14B C14 H14C 109.5 . . ? 
 
_diffrn_measured_fraction_theta_max    0.994 
_diffrn_reflns_theta_full              28.28 
_diffrn_measured_fraction_theta_full   0.994 
_refine_diff_density_max    0.209 
_refine_diff_density_min   -0.207 
_refine_diff_density_rms    0.047 
